# Supplementary material for: H2O2-Induced Oxidative Stress Responses in Eriocheir sinensis: Antioxidant Defense and Immune Gene Expression Dynamics
Source: MDPI journal article supplement (doi:10.3390/antiox13050524), 2024-04-26
Supplement: s1 [file s1]

Table s1. Effects of stressors on the antioxidant capacity of decapoda crustaceans. ↓: decrease activity; ↑: increase activity.

| species                     | Treatment                        | Changes in antioxidant enzyme activity | Duration | Growth stage | Tissue                             | Reference |
|-----------------------------|----------------------------------|----------------------------------------|----------|--------------|------------------------------------|-----------|
| <i>Eriocheir sinensis</i>   | Hypoxia                          | SOD↑ CAT↑ T-AOC↑ MDA↑                  | 24h      | Juvenile     | Gill, Muscles and hepatopancreas   | [1]       |
|                             | salinity                         | SOD↑CAT↑ T-AOC↑ GSH-Px↑ MDA↑           | 72h      | Female adult | hepatopancreas                     | [2]       |
|                             | cadmium                          | SOD↑↓ CAT↑↓ GSH-Px↑↓ MDA↑<br>H2O2↑     | 6d       | adult        | hepatopancreas                     | [3]       |
|                             | ammonia                          | SOD↑↓ CAT↑↓ GSH-Px↓                    | 24h      | Juvenile     | hepatopancreas                     | [4]       |
|                             | saline-alkali                    | SOD↑↓ CAT↑↓ T-AOC↑↓ MDA↑               | 96h      | Juvenile     | hepatopancreas                     | [5]       |
|                             | abamectin                        | MDA↑8-OHDG↑                            | 24h      | adult        | hepatopancreas                     | [6]       |
| <i>Litopenaeus Vannamei</i> | hypoxia                          | SOD↑↓ CAT↑↓ GSH-Px↑↓ MDA↑↓             | 24h      | Juvenile     | gill, hepatopancreas and hemolymph | [7]       |
|                             | low temperature and air exposure | SOD↑↓CAT↑↓GSH-Px↑↓TAOC↑↓<br>MDA↑↓      | 24h      | Juvenile     | hepatopancreas and hemolymph       | [8]       |
|                             | <i>Vibrio parahaemolyticus</i>   | SOD↓ GSH-Px↓ MDA↑                      | 72h      | Juvenile     | serum                              | [9]       |
|                             | aflatoxin B1                     | SOD↑↓CAT↑↓GSH-Px↑↓ MDA↑                | 30 d     | Juvenile     | Intestines and hepatopancreas      | [10]      |
| <i>Penaeus monodon</i>      | <i>Vibrio parahaemolyticus</i>   | SOD↑↓ CAT↓GSH-Px↑↓MDA↑↓                | 24h      | Juvenile     | Gill and hepatopancreas            | [11]      |
|                             | desiccation                      | SOD↑↓ CAT↓GSH-Px↑↓MDA↑                 | 3h       | Juvenile     | hepatopancreas                     | [12]      |
| <i>Procambarus clarkii</i>  | acute hypoxia                    | SOD↑↓CAT↑↓GSH-Px↑↓                     | 13h      | adult        | hepatopancreas                     | [13]      |
|                             | polystyrene microplastics (PS)   | SOD↑CAT↑GSH-Px↑↓ MDA↑                  | 48h      | Juvenile     | hepatopancreas                     | [14]      |

|                                 |                                  |                          |     |          |                                                  |      |
|---------------------------------|----------------------------------|--------------------------|-----|----------|--------------------------------------------------|------|
|                                 | coppe (Cu)                       | SOD↑CAT↑GSH-Px↑↓ MDA↑↓   |     |          |                                                  |      |
|                                 | PS and Cu                        | SOD↑CAT↑↓GSH-Px↑↓ MDA↑↓  |     |          |                                                  |      |
|                                 | thermal stress                   | SOD↑↓CAT↑↓ T-AOC↑↓ MDA↑↓ | 96h | Juvenile | hepatopancreas                                   | [15] |
|                                 | silicone                         | SOD↑CAT↑ MDA↑            | 72h | adult    | gill, muscle and carapace                        | [16] |
|                                 | deltamethrin                     | 8-OHDG↑                  | 96h | Juvenile | serum                                            | [17] |
| <i>Charybdis japonica</i>       | sulfide                          | SOD↑↓CAT↑↓               | 96h | adult    | hemolymph                                        | [18] |
|                                 | bisphenol A                      | SOD↑↓CAT↑↓ GSH-Px↑↓ MDA↑ | 15d | adult    | hepatopancreas and hemolymph                     | [19] |
| <i>Portunus trituberculatus</i> | cold acclimation                 | SOD↑CAT↑ MDA↑            | 21d | adult    | muscle and hepatopancreas                        | [20] |
|                                 | cadmium                          | SOD↑↓CAT↑↓ GSH↑↓         | 96h | juvenile |                                                  | [21] |
| <i>Fenneropenaeus chinensis</i> | cadmium                          | SOD↑↓CAT↓ GSH↑↓          | 96h | juvenile |                                                  | [21] |
|                                 | white spot syndrome virus (wssv) | SOD↑↓CAT↑↓T-AOC↑↓        | 72h | juvenile | gill, muscles,plasma, stomach and hepatopancreas | [22] |

## References:

- [1]. Chen, X., et al., Alteration of antioxidant status, glucose metabolism, and hypoxia signal pathway in *Eriocheir sinensis* after acute hypoxic stress and reoxygenation. *Comparative Biochemistry and Physiology Part C: Toxicology & Pharmacology*, 2023. 268: p. 109604.
- [2]. Wang, X., et al., Effects of acute salinity stress on osmoregulation, antioxidant capacity and physiological metabolism of female Chinese mitten crabs (*Eriocheir sinensis*). *Aquaculture*, 2022. 552: p. 737989.
- [3]. Lin, Y., et al., Cell damage and apoptosis in the hepatopancreas of *Eriocheir sinensis* induced by cadmium. *Aquatic toxicology*, 2017. 190: p. 190-198.
- [4]. Wang, T., et al., Metabolic changes and stress damage induced by ammonia exposure in juvenile *Eriocheir sinensis*. *Ecotoxicology and Environmental Safety*, 2021. 223: p. 112608.
- [5]. Zhang, R., et al., Effects of saline-alkali stress on the tissue structure, antioxidation, immunocompetence and metabolomics of *Eriocheir sinensis*. *The Science of the total environment*, 2023. 871: p. 162109-162109.
- [6]. Hong, Y., et al., Cytotoxicity induced by abamectin in hepatopancreas cells of Chinese mitten crab, *Eriocheir sinensis*: An in vitro assay. *Ecotoxicology and Environmental Safety*, 2023. 262: p. 115198.
- [7]. Li, Y., et al., Oxidative stress, DNA damage and antioxidant enzyme activities in the pacific white shrimp (*Litopenaeus vannamei*) when exposed to hypoxia and reoxygenation. *Chemosphere*, 2016. 144: p. 234-240.
- [8]. Xu, Z., et al., The oxidative stress and antioxidant responses of *Litopenaeus vannamei* to low temperature and air exposure. *Fish & Shellfish Immunology*, 2018. 72: p. 564-571.
- [9]. Jiao, L., et al., *Vibrio parahaemolyticus* Infection Influenced Trace Element Homeostasis, Impaired Antioxidant Function, and Induced Inflammation Response in *Litopenaeus vannamei*. *Biological Trace Element Research*, 2021. 199(1): p. 329-337.
- [10]. Wang, Y., et al., Aflatoxin B1 (AFB1) induced dysregulation of intestinal microbiota and damage of antioxidant system in pacific white shrimp (*Litopenaeus vannamei*). *Aquaculture*, 2018. 495: p. 940-947.
- [11]. Duan, Y., et al., Oxidative stress response of the black tiger shrimp *Penaeus monodon* to *Vibrio parahaemolyticus* challenge. *Fish & shellfish immunology*, 2015. 46(2): p. 354-365.
- [12]. Duan, Y., et al., Effect of desiccation on oxidative stress and antioxidant response of the black tiger shrimp *Penaeus monodon*. *Fish & shellfish immunology*, 2016. 58: p. 10-17.
- [13]. Zhang, L., et al., Acute hypoxia and reoxygenation induces oxidative stress, glycometabolism, and oxygen transport change in red swamp crayfish (*Procambarus clarkii*): Application of transcriptome profiling in assessment of hypoxia. *Aquaculture Reports*, 2022. 23: p. 101029.
- [14]. Zeng, Q., et al., Polystyrene microplastics enhanced copper-induced acute immunotoxicity in red swamp crayfish (*Procambarus clarkii*). *Ecotoxicology and Environmental Safety*, 2023. 249: p. 114432.
- [15]. Ruan, G., et al., Short-term adaptability to non-hyperthermal stress: Antioxidant, immune and gut microbial responses in the red swamp crayfish, *Procambarus clarkii*. *Aquaculture*, 2022. 560: p. 738497.
- [16]. Hossain, M.M., et al., Silicone stressed response of crayfish (*Procambarus clarkii*) in antioxidant

- enzyme activity and related gene expression. *Environmental Pollution*, 2021. 274: p. 115836.
- [17]. Hong, Y., et al., DNA damage, immunotoxicity, and neurotoxicity induced by deltamethrin on the freshwater crayfish, *Procambarus clarkii*. *Environmental Toxicology*, 2021. 36(1): p. 16-23.
- [18]. Xu, X.H., et al., Immunological and histological responses to sulfide in the crab *Charybdis japonica*. *Aquatic toxicology*, 2014. 150: p. 144-150.
- [19]. Peng, Y.Q., et al., Immunological responses in haemolymph and histologic changes in the hepatopancreas of *Charybdis japonica* (A. Milne-Edwards, 1861) (Decapoda: Brachyura: Portunidae) exposed to bisphenol A. *Journal of Crustacean Biology*, 2018. 38(4): p. 489-496.
- [20]. Meng, X., et al., Physiological responses of swimming crab *Portunus trituberculatus* under cold acclimation: Antioxidant defense and heat shock proteins. *Aquaculture*, 2014. 434: p. 11-17.
- [21]. Wang, S., et al., Toxicological responses of juvenile Chinese shrimp *Fenneropenaeus chinensis* and swimming crab *Portunus trituberculatus* exposed to cadmium. *Ecotoxicology and Environmental Safety*, 2022. 234: p. 113416.
- [22]. Lu, Y., et al., Antioxidant responses of *Fenneropenaeus chinensis* to white spot syndrome virus challenge. *Aquaculture international*, 2020. 28(1): p. 139-151.
